# Supplementary material for: Phosphorescent Organometallic Knots of Gold(I)-Bis(acetylide) Strands Directed by Copper(I) π-Coordination
Source: Research Square preprint supplement (doi:10.21203/rs.3.rs-900601/v1), 2021-09-17

# checkCIF/PLATON report

Structure factors have been supplied for datablock(s) Au8Cu6\_complex\_4

THIS REPORT IS FOR GUIDANCE ONLY. IF USED AS PART OF A REVIEW PROCEDURE FOR PUBLICATION, IT SHOULD NOT REPLACE THE EXPERTISE OF AN EXPERIENCED CRYSTALLOGRAPHIC REFEREE.

No syntax errors found.      CIF dictionary      Interpreting this report

## Datablock: Au8Cu6\_complex\_4

---

|                        |                                  |                       |             |
|------------------------|----------------------------------|-----------------------|-------------|
| Bond precision:        | C-C = 0.0171 A                   | Wavelength=0.71073    |             |
| Cell:                  | a=22.9670(12)                    | b=28.1979(16)         | c=39.221(2) |
|                        | alpha=90                         | beta=92.129(2)        | gamma=90    |
| Temperature:           | 100 K                            |                       |             |
|                        | Calculated                       | Reported              |             |
| Volume                 | 25383(2)                         | 25383(2)              |             |
| Space group            | C 2/c                            | C 2/c                 |             |
| Hall group             | -C 2yc                           | -C 2yc                |             |
| Moiety formula         | C192 H184 Au8 Cu6 N8 [+ solvent] | ?                     |             |
| Sum formula            | C192 H184 Au8 Cu6 N8 [+ solvent] | C204 H216 Au8 Cu6 N10 |             |
| Mr                     | 4560.54                          | 4764.83               |             |
| Dx, g cm <sup>-3</sup> | 1.193                            | 1.247                 |             |
| Z                      | 4                                | 4                     |             |
| Mu (mm <sup>-1</sup> ) | 5.130                            | 5.134                 |             |
| F000                   | 8792.0                           | 9264.0                |             |
| F000'                  | 8741.08                          |                       |             |
| h,k,lmax               | 28,35,49                         | 28,35,49              |             |
| Nref                   | 26525                            | 25796                 |             |
| Tmin,Tmax              | 0.545,0.774                      | 0.496,0.745           |             |
| Tmin'                  | 0.535                            |                       |             |

Correction method= # Reported T Limits: Tmin=0.496 Tmax=0.745  
AbsCorr = MULTI-SCAN

Data completeness= 0.973      Theta(max)= 26.583

R(reflections)= 0.0584( 13490)      wR2(reflections)= 0.2032( 25796)

S = 1.018      Npar= 953

---

The following ALERTS were generated. Each ALERT has the format

**test-name\_ALERT\_alert-type\_alert-level.**

Click on the hyperlinks for more details of the test.

---

### Alert level B

|                                                                    |                             |     |        |
|--------------------------------------------------------------------|-----------------------------|-----|--------|
| PLAT213_ALERT_2_B Atom C43                                         | has ADP max/min Ratio ..... | 4.7 | prolat |
| PLAT213_ALERT_2_B Atom C46                                         | has ADP max/min Ratio ..... | 4.1 | prolat |
| PLAT242_ALERT_2_B Low 'MainMol' Ueq as Compared to Neighbors of    |                             | C54 | Check  |
| PLAT910_ALERT_3_B Missing # of FCF Reflection(s) Below Theta(Min). |                             | 16  | Note   |
| PLAT919_ALERT_3_B Reflection # Likely Affected by the Beamstop ... |                             | 2   | Check  |
| PLAT934_ALERT_3_B Number of (Iobs-Icalc)/Sigma(W) > 10 Outliers .. |                             | 9   | Check  |

---

### Alert level C

ABSTY02\_ALERT\_1\_C An \_exptl\_absorpt\_correction\_type has been given without  
a literature citation. This should be contained in the  
\_exptl\_absorpt\_process\_details field.

Absorption correction given as multi-scan

|                                                                  |                             |      |        |
|------------------------------------------------------------------|-----------------------------|------|--------|
| PLAT213_ALERT_2_C Atom C7                                        | has ADP max/min Ratio ..... | 3.2  | prolat |
| PLAT213_ALERT_2_C Atom C9                                        | has ADP max/min Ratio ..... | 3.1  | prolat |
| PLAT213_ALERT_2_C Atom C16                                       | has ADP max/min Ratio ..... | 3.4  | prolat |
| PLAT213_ALERT_2_C Atom C17                                       | has ADP max/min Ratio ..... | 3.2  | prolat |
| PLAT213_ALERT_2_C Atom C18                                       | has ADP max/min Ratio ..... | 3.2  | prolat |
| PLAT213_ALERT_2_C Atom C32                                       | has ADP max/min Ratio ..... | 3.2  | prolat |
| PLAT213_ALERT_2_C Atom C37                                       | has ADP max/min Ratio ..... | 4.0  | prolat |
| PLAT213_ALERT_2_C Atom C38                                       | has ADP max/min Ratio ..... | 3.8  | prolat |
| PLAT213_ALERT_2_C Atom C39                                       | has ADP max/min Ratio ..... | 3.8  | prolat |
| PLAT213_ALERT_2_C Atom C40                                       | has ADP max/min Ratio ..... | 4.0  | prolat |
| PLAT213_ALERT_2_C Atom C41                                       | has ADP max/min Ratio ..... | 3.5  | prolat |
| PLAT213_ALERT_2_C Atom C42                                       | has ADP max/min Ratio ..... | 3.2  | prolat |
| PLAT213_ALERT_2_C Atom C45                                       | has ADP max/min Ratio ..... | 3.8  | prolat |
| PLAT220_ALERT_2_C NonSolvent Resd 1 C Ueq(max)/Ueq(min) Range    |                             | 4.5  | Ratio  |
| PLAT222_ALERT_3_C NonSolvent Resd 1 H Uiso(max)/Uiso(min) Range  |                             | 5.2  | Ratio  |
| PLAT234_ALERT_4_C Large Hirshfeld Difference Au4 --C48 .         |                             | 0.23 | Ang.   |
| PLAT234_ALERT_4_C Large Hirshfeld Difference Au5 --C73 .         |                             | 0.23 | Ang.   |
| PLAT234_ALERT_4_C Large Hirshfeld Difference Cu3 --C47 .         |                             | 0.22 | Ang.   |
| PLAT234_ALERT_4_C Large Hirshfeld Difference C5 --C10 .          |                             | 0.17 | Ang.   |
| PLAT234_ALERT_4_C Large Hirshfeld Difference C6 --C7 .           |                             | 0.18 | Ang.   |
| PLAT234_ALERT_4_C Large Hirshfeld Difference C29 --C34 .         |                             | 0.20 | Ang.   |
| PLAT234_ALERT_4_C Large Hirshfeld Difference C30 --C31 .         |                             | 0.23 | Ang.   |
| PLAT234_ALERT_4_C Large Hirshfeld Difference C35 --C38 .         |                             | 0.18 | Ang.   |
| PLAT234_ALERT_4_C Large Hirshfeld Difference C47 --C48 .         |                             | 0.22 | Ang.   |
| PLAT234_ALERT_4_C Large Hirshfeld Difference C54 --C55 .         |                             | 0.19 | Ang.   |
| PLAT234_ALERT_4_C Large Hirshfeld Difference C63 --C64 .         |                             | 0.21 | Ang.   |
| PLAT234_ALERT_4_C Large Hirshfeld Difference C70 --C71 .         |                             | 0.17 | Ang.   |
| PLAT234_ALERT_4_C Large Hirshfeld Difference C73 --C74 .         |                             | 0.23 | Ang.   |
| PLAT234_ALERT_4_C Large Hirshfeld Difference C75 --C84 .         |                             | 0.18 | Ang.   |
| PLAT234_ALERT_4_C Large Hirshfeld Difference C76 --C77 .         |                             | 0.19 | Ang.   |
| PLAT234_ALERT_4_C Large Hirshfeld Difference C83 --C86 .         |                             | 0.19 | Ang.   |
| PLAT241_ALERT_2_C High 'MainMol' Ueq as Compared to Neighbors of |                             | Cu3  | Check  |
| PLAT241_ALERT_2_C High 'MainMol' Ueq as Compared to Neighbors of |                             | C16  | Check  |
| PLAT241_ALERT_2_C High 'MainMol' Ueq as Compared to Neighbors of |                             | C38  | Check  |
| PLAT241_ALERT_2_C High 'MainMol' Ueq as Compared to Neighbors of |                             | C46  | Check  |
| PLAT241_ALERT_2_C High 'MainMol' Ueq as Compared to Neighbors of |                             | C73  | Check  |
| PLAT241_ALERT_2_C High 'MainMol' Ueq as Compared to Neighbors of |                             | C77  | Check  |
| PLAT242_ALERT_2_C Low 'MainMol' Ueq as Compared to Neighbors of  |                             | C6   | Check  |
| PLAT242_ALERT_2_C Low 'MainMol' Ueq as Compared to Neighbors of  |                             | C15  | Check  |
| PLAT242_ALERT_2_C Low 'MainMol' Ueq as Compared to Neighbors of  |                             | C17  | Check  |
| PLAT242_ALERT_2_C Low 'MainMol' Ueq as Compared to Neighbors of  |                             | C30  | Check  |
| PLAT242_ALERT_2_C Low 'MainMol' Ueq as Compared to Neighbors of  |                             | C35  | Check  |

|                   |                                                  |                                            |         |              |
|-------------------|--------------------------------------------------|--------------------------------------------|---------|--------------|
| PLAT242_ALERT_2_C | Low                                              | 'MainMol' Ueq as Compared to Neighbors of  | C37     | Check        |
| PLAT242_ALERT_2_C | Low                                              | 'MainMol' Ueq as Compared to Neighbors of  | C76     | Check        |
| PLAT250_ALERT_2_C | Large                                            | U3/U1 Ratio for Average U(i,j) Tensor .... | 3.1     | Note         |
| PLAT260_ALERT_2_C | Large                                            | Average Ueq of Residue Including Aul       | 0.110   | Check        |
| PLAT342_ALERT_3_C | Low                                              | Bond Precision on C-C Bonds .....          | 0.01711 | Ang.         |
| PLAT420_ALERT_2_C | D-H Bond Without Acceptor                        | N1 --H1A .                                 |         | Please Check |
| PLAT420_ALERT_2_C | D-H Bond Without Acceptor                        | N2 --H2A .                                 |         | Please Check |
| PLAT420_ALERT_2_C | D-H Bond Without Acceptor                        | N3 --H3A .                                 |         | Please Check |
| PLAT420_ALERT_2_C | D-H Bond Without Acceptor                        | N4 --H4A .                                 |         | Please Check |
| PLAT905_ALERT_3_C | Negative                                         | K value in the Analysis of Variance ...    | -6.559  | Report       |
| PLAT911_ALERT_3_C | Missing                                          | FCF Refl Between Thmin & STh/L= 0.600      | 347     | Report       |
| PLAT918_ALERT_3_C | Reflection(s) with I(obs) much Smaller I(calc) . |                                            | 4       | Check        |
| PLAT977_ALERT_2_C | Check                                            | Negative Difference Density on H31A        | -0.33   | eA-3         |
| PLAT977_ALERT_2_C | Check                                            | Negative Difference Density on H31B        | -0.33   | eA-3         |
| PLAT977_ALERT_2_C | Check                                            | Negative Difference Density on H81A        | -0.39   | eA-3         |

## ● Alert level G

FORMU01\_ALERT\_2\_G There is a discrepancy between the atom counts in the  
 \_chemical\_formula\_sum and the formula from the \_atom\_site\* data.  
 Atom count from \_chemical\_formula\_sum: C204 H216 Au8 Cu6 N10  
 Atom count from the \_atom\_site data: C192 H184 Au8 Cu6 N8  
 CELLZ01\_ALERT\_1\_G Difference between formula and atom\_site contents detected.  
 CELLZ01\_ALERT\_1\_G ALERT: Large difference may be due to a  
 symmetry error - see SYMMG tests  
 From the CIF: \_cell\_formula\_units\_Z 4  
 From the CIF: \_chemical\_formula\_sum C204 H216 Au8 Cu6 N10  
 TEST: Compare cell contents of formula and atom\_site data

| atom | Z*formula | cif sites | diff   |
|------|-----------|-----------|--------|
| C    | 816.00    | 768.00    | 48.00  |
| H    | 864.00    | 736.00    | 128.00 |
| Au   | 32.00     | 32.00     | 0.00   |
| Cu   | 24.00     | 24.00     | 0.00   |
| N    | 40.00     | 32.00     | 8.00   |

|                   |                                                  |      |              |
|-------------------|--------------------------------------------------|------|--------------|
| PLAT002_ALERT_2_G | Number of Distance or Angle Restraints on AtSite | 15   | Note         |
| PLAT003_ALERT_2_G | Number of Uiso or Uij Restrained non-H Atoms ... | 29   | Report       |
| PLAT007_ALERT_5_G | Number of Unrefined Donor-H Atoms .....          | 4    | Report       |
| PLAT041_ALERT_1_G | Calc. and Reported SumFormula Strings Differ     |      | Please Check |
| PLAT172_ALERT_4_G | The CIF-Embedded .res File Contains DFIX Records | 3    | Report       |
| PLAT173_ALERT_4_G | The CIF-Embedded .res File Contains DANG Records | 4    | Report       |
| PLAT177_ALERT_4_G | The CIF-Embedded .res File Contains DELU Records | 6    | Report       |
| PLAT178_ALERT_4_G | The CIF-Embedded .res File Contains SIMU Records | 6    | Report       |
| PLAT232_ALERT_2_G | Hirshfeld Test Diff (M-X) Cu3 --C48 .            | 6.2  | s.u.         |
| PLAT333_ALERT_2_G | Large Aver C6-Ring C-C Dist C75 -C84 .           | 1.43 | Ang.         |
| PLAT335_ALERT_2_G | Check Large C6 Ring C-C Range C75 -C84           | 0.21 | Ang.         |
| PLAT343_ALERT_2_G | Unusual Angle Range in Main Residue for          | C1   | Check        |
| PLAT343_ALERT_2_G | Unusual sp? Angle Range in Main Residue for      | C23  | Check        |
| PLAT343_ALERT_2_G | Unusual sp? Angle Range in Main Residue for      | C24  | Check        |
| PLAT343_ALERT_2_G | Unusual sp? Angle Range in Main Residue for      | C25  | Check        |
| PLAT343_ALERT_2_G | Unusual sp? Angle Range in Main Residue for      | C49  | Check        |
| PLAT343_ALERT_2_G | Unusual sp? Angle Range in Main Residue for      | C72  | Check        |
| PLAT343_ALERT_2_G | Unusual sp? Angle Range in Main Residue for      | C73  | Check        |
| PLAT371_ALERT_2_G | Long C(sp2)-C(sp1) Bond C26 - C27 .              | 1.44 | Ang.         |
| PLAT371_ALERT_2_G | Long C(sp2)-C(sp1) Bond C46 - C47 .              | 1.46 | Ang.         |
| PLAT371_ALERT_2_G | Long C(sp2)-C(sp1) Bond C50 - C51 .              | 1.43 | Ang.         |
| PLAT371_ALERT_2_G | Long C(sp2)-C(sp1) Bond C70 - C71 .              | 1.45 | Ang.         |
| PLAT371_ALERT_2_G | Long C(sp2)-C(sp1) Bond C74 - C75 .              | 1.47 | Ang.         |
| PLAT371_ALERT_2_G | Long C(sp2)-C(sp1) Bond C90 - C95 .              | 1.45 | Ang.         |
| PLAT606_ALERT_4_G | Solvent Accessible VOID(S) in Structure .....    |      | ! Info       |
| PLAT860_ALERT_3_G | Number of Least-Squares Restraints .....         | 241  | Note         |

|                   |                                                  |        |        |
|-------------------|--------------------------------------------------|--------|--------|
| PLAT869_ALERT_4_G | ALERTS Related to the Use of SQUEEZE Suppressed  | !      | Info   |
| PLAT883_ALERT_1_G | No Info/Value for _atom_sites_solution_primary . | Please | Do !   |
| PLAT912_ALERT_4_G | Missing # of FCF Reflections Above STh/L= 0.600  | 365    | Note   |
| PLAT913_ALERT_3_G | Missing # of Very Strong Reflections in FCF .... | 1      | Note   |
| PLAT941_ALERT_3_G | Average HKL Measurement Multiplicity .....       | 3.3    | Low    |
| PLAT966_ALERT_5_G | Note: Non-Standard (i.e. 2.0) OMIT Threshold of  | 2.0    | Sig(I) |
| PLAT978_ALERT_2_G | Number C-C Bonds with Positive Residual Density. | 0      | Info   |

---

0 **ALERT level A** = Most likely a serious problem - resolve or explain  
6 **ALERT level B** = A potentially serious problem, consider carefully  
58 **ALERT level C** = Check. Ensure it is not caused by an omission or oversight  
36 **ALERT level G** = General information/check it is not something unexpected

5 ALERT type 1 CIF construction/syntax error, inconsistent or missing data  
59 ALERT type 2 Indicator that the structure model may be wrong or deficient  
11 ALERT type 3 Indicator that the structure quality may be low  
23 ALERT type 4 Improvement, methodology, query or suggestion  
2 ALERT type 5 Informative message, check

---

It is advisable to attempt to resolve as many as possible of the alerts in all categories. Often the minor alerts point to easily fixed oversights, errors and omissions in your CIF or refinement strategy, so attention to these fine details can be worthwhile. In order to resolve some of the more serious problems it may be necessary to carry out additional measurements or structure refinements. However, the purpose of your study may justify the reported deviations and the more serious of these should normally be commented upon in the discussion or experimental section of a paper or in the "special\_details" fields of the CIF. checkCIF was carefully designed to identify outliers and unusual parameters, but every test has its limitations and alerts that are not important in a particular case may appear. Conversely, the absence of alerts does not guarantee there are no aspects of the results needing attention. It is up to the individual to critically assess their own results and, if necessary, seek expert advice.

### Publication of your CIF in IUCr journals

A basic structural check has been run on your CIF. These basic checks will be run on all CIFs submitted for publication in IUCr journals (*Acta Crystallographica*, *Journal of Applied Crystallography*, *Journal of Synchrotron Radiation*); however, if you intend to submit to *Acta Crystallographica Section C* or *E* or *IUCrData*, you should make sure that full publication checks are run on the final version of your CIF prior to submission.

### Publication of your CIF in other journals

Please refer to the *Notes for Authors* of the relevant journal for any special instructions relating to CIF submission.

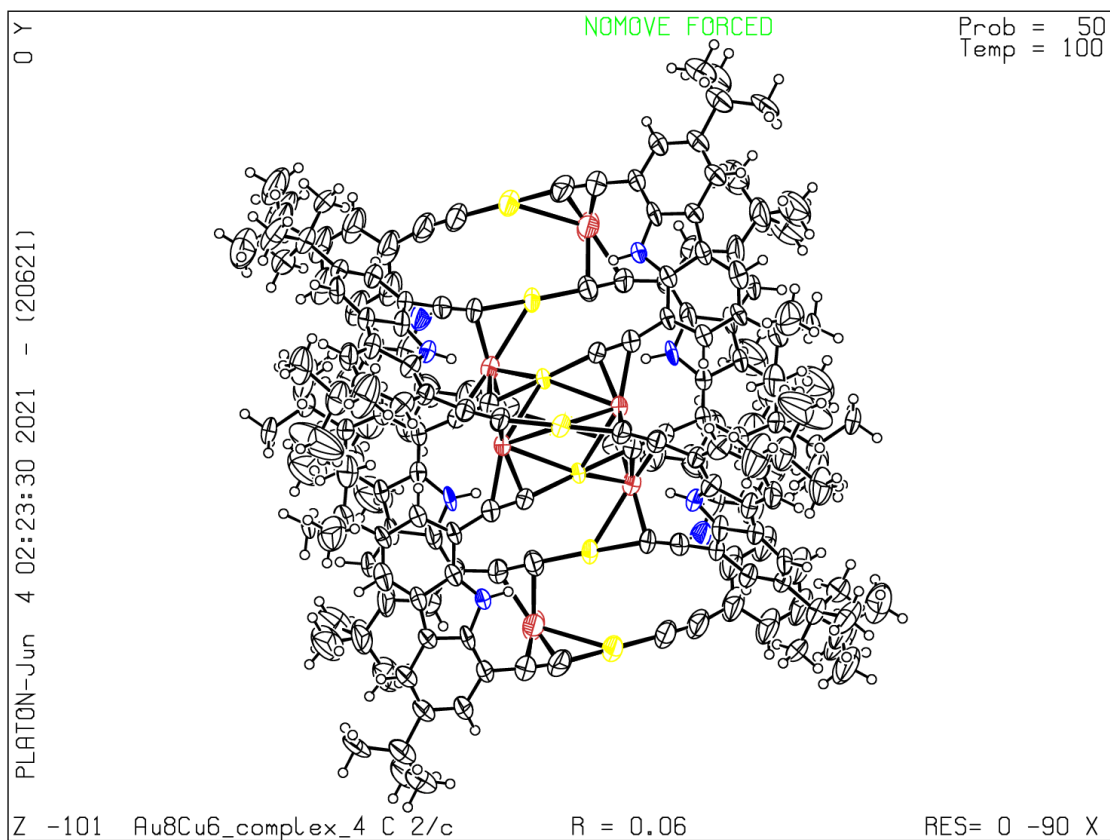

Supplement: Supplementary file 1 [file 24996b8232401f6672c74f98.pdf]
